# Supplementary material for: Adult-Onset CNS Sulfatide Deficiency Causes Sex-Dependent Metabolic Disruption in Aging
Source: MDPI journal article supplement (doi:10.3390/ijms241310483), 2023-06-22
Supplement: s1 [file s1]

### **Adult-onset CNS sulfatide deficiency causes sex-dependent metabolic disruption in aging**

Shulan Qiu<sup>1,2,†</sup>, Sijia He<sup>1,†</sup>, Jianing Wang<sup>1,‡</sup>, Hu Wang<sup>1</sup>, Anindita Bhattacharjee<sup>1</sup>,  
Xin Li<sup>1</sup>, Moawiz Saeed<sup>1</sup>, Jeffrey L. Dupree<sup>3,4</sup>, and Xianlin Han<sup>1,2,\*</sup>

<sup>1</sup>Barshop Institute for Longevity and Aging Studies, University of Texas Health Science Center at San Antonio, San Antonio, TX 78229, USA

<sup>2</sup>Division of Diabetes, Department of Medicine, University of Texas Health Science Center at San Antonio, San Antonio, TX 78229, USA

<sup>3</sup>Department of Anatomy and Neurobiology, Virginia Commonwealth University, Richmond, VA 23284, USA

<sup>4</sup>Research Division, McGuire Veterans Affairs Medical Center, Richmond, VA 23249, USA

\* Correspondence: [hanx@uthscsa.edu](mailto:hanx@uthscsa.edu)

† These authors have equal contribution to this study.

‡ Present address of Jianing Wang: State Key Lab. of Environmental & Biological

Analysis, Department of Chemistry, Hong Kong Baptist University, Hong Kong, China.

○ M, CST Cre<sup>-</sup>    ○ M, CST Cre<sup>+</sup>    ○ F, CST Cre<sup>-</sup>    ○ F, CST Cre<sup>+</sup>

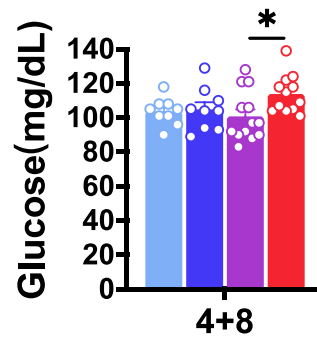

Figure S1. Blood glucose levels measured without fasting at 8 months post tamoxefin injection under normal diet. n=9-14. Multiple t-Test.

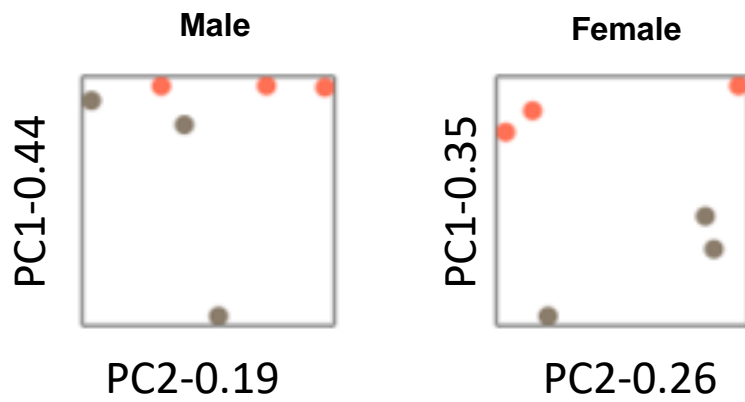

Figure S2. PCA showing that female CST Cre+ cluster in a more distinct manner versus Cre-female mice relative to male CST Cre+ and Cre- mice

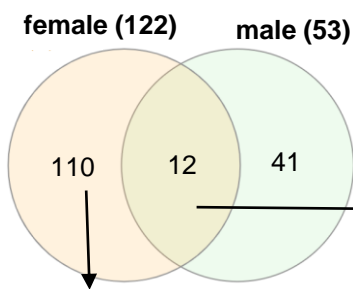

|                |                |                 |              |
|----------------|----------------|-----------------|--------------|
| <i>Bcl2a1a</i> | <i>Ccl3</i>    | <i>Ccl4</i>     | <i>Cd86</i>  |
| <i>Ch25h</i>   | <i>Gal3st1</i> | <i>lag3</i>     | <i>Mmp12</i> |
| <i>Opalin</i>  | <i>Ptpn6</i>   | <i>Serina3n</i> | <i>Timp1</i> |

|                |                |                |                 |                |                |               |                |               |                |
|----------------|----------------|----------------|-----------------|----------------|----------------|---------------|----------------|---------------|----------------|
| <i>Apoe</i>    | <i>Atf3</i>    | <i>Axl</i>     | <i>Bag4</i>     | <i>Bcl10</i>   | <i>Blnk</i>    | <i>Bok</i>    | <i>Clqa</i>    | <i>Clqb</i>   | <i>Clqc</i>    |
| <i>C3</i>      | <i>C3ar1</i>   | <i>C4a</i>     | <i>C5ar1</i>    | <i>Cables1</i> | <i>Casp7</i>   | <i>Ccl2</i>   | <i>Ccl5</i>    | <i>Ccl7</i>   | <i>Cd109</i>   |
| <i>C4</i>      | <i>Cd33</i>    | <i>Cd68</i>    | <i>Cd72</i>     | <i>Cd84</i>    | <i>Clec7a</i>  | <i>Cotl1</i>  | <i>Csf1</i>    | <i>Csflr</i>  | <i>Csf3r</i>   |
| <i>Cst7</i>    | <i>Ctss</i>    | <i>Cx3cr1</i>  | <i>Dock2</i>    | <i>ErbB3</i>   | <i>F3</i>      | <i>Fabp5</i>  | <i>Fbln5</i>   | <i>Fcer1g</i> | <i>Fcgr1</i>   |
| <i>Fcgr2b</i>  | <i>Fcgr3</i>   | <i>Fcrls</i>   | <i>Fgd2</i>     | <i>Gadd45a</i> | <i>Gadd45g</i> | <i>Gpr183</i> | <i>Gpr34</i>   | <i>Grn</i>    | <i>Hmox1</i>   |
| <i>Hsd11b1</i> | <i>Hspb1</i>   | <i>Icam2</i>   | <i>Ifi30</i>    | <i>Igsf6</i>   | <i>Il2rg</i>   | <i>Il3ra</i>  | <i>Inpp5d</i>  | <i>Irak2</i>  | <i>Irf8</i>    |
| <i>Itgax</i>   | <i>Itgb5</i>   | <i>Jag1</i>    | <i>Lilrb4a</i>  | <i>Ly9</i>     | <i>Lyn</i>     | <i>Mafk</i>   | <i>Man2b1</i>  | <i>Mbd3</i>   | <i>Mcm2</i>    |
| <i>Mef2c</i>   | <i>Mpeg1</i>   | <i>Mr1</i>     | <i>Msn</i>      | <i>Myp</i>     | <i>Myc</i>     | <i>Ncf1</i>   | <i>Nfkb2</i>   | <i>Osmr</i>   | <i>Pdpn</i>    |
| <i>Pla2g4a</i> | <i>Plcg2</i>   | <i>Pros1</i>   | <i>Psmb8</i>    | <i>Rad51c</i>  | <i>Relb</i>    | <i>Rsad2</i>  | <i>S100a10</i> | <i>Slpr3</i>  | <i>Siglecf</i> |
| <i>Slamf9</i>  | <i>Slc10a6</i> | <i>Slco2b1</i> | <i>Sox9</i>     | <i>Spp1</i>    | <i>Tcirg1</i>  | <i>Tgfb1</i>  | <i>Tgfb1</i>   | <i>Tgm1</i>   | <i>Tlr2</i>    |
| <i>Tlr7</i>    | <i>Tm4sf1</i>  | <i>Tmem204</i> | <i>Tnfrsf1a</i> | <i>Traf2</i>   | <i>Trem2</i>   | <i>Trp53</i>  | <i>Tyrobp</i>  | <i>Vav1</i>   | <i>Vim</i>     |

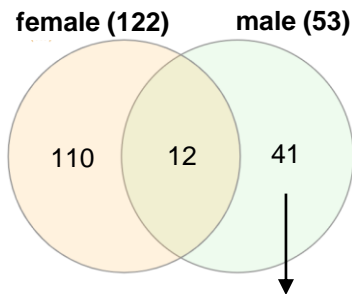

|              |              |               |              |              |               |             |                |                  |               |
|--------------|--------------|---------------|--------------|--------------|---------------|-------------|----------------|------------------|---------------|
| <i>Atg3</i>  | <i>Atg5</i>  | <i>Atm</i>    | <i>Brd2</i>  | <i>Casp8</i> | <i>Cd69</i>   | <i>Cd70</i> | <i>Creb1</i>   | <i>Csk</i>       | <i>Ctse</i>   |
| <i>E2f1</i>  | <i>Esam</i>  | <i>Fcrla</i>  | <i>Fdxr</i>  | <i>Foxp3</i> | <i>Gpr84</i>  | <i>Igf1</i> | <i>Il21r</i>   | <i>Irf2</i>      | <i>Irf7</i>   |
| <i>Islr2</i> | <i>Itga6</i> | <i>Kcnk13</i> | <i>Kdm4a</i> | <i>Klrl1</i> | <i>Kmt2c</i>  | <i>Lig1</i> | <i>Ly6a</i>    | <i>Myct1</i>     | <i>Pnoc</i>   |
| <i>Ptx3</i>  | <i>Rab6b</i> | <i>Ripk1</i>  | <i>Setd7</i> | <i>Sin3a</i> | <i>Slamf8</i> | <i>Snca</i> | <i>Tmem119</i> | <i>Tnfrsf11b</i> | <i>Tnfsf8</i> |
| <i>Vps4a</i> |              |               |              |              |               |             |                |                  |               |

Figure S3. DEGs lists in Venn diagrams from female or male CST Cre<sup>+</sup> vs. CST Cre<sup>-</sup>.
